# Supplementary material for: Differences in neurotropism and neurotoxicity among retrograde viral tracers
Source: PubMed Central journal article supplement (PMC6368820; doi:10.1186/s13024-019-0308-6), 2019-02-08

**A****LHA: rAAV2-retro**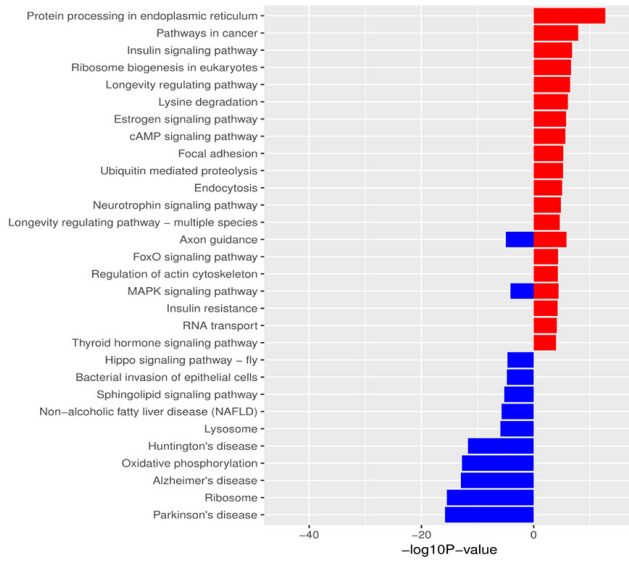**B****LHA: RV-ΔG**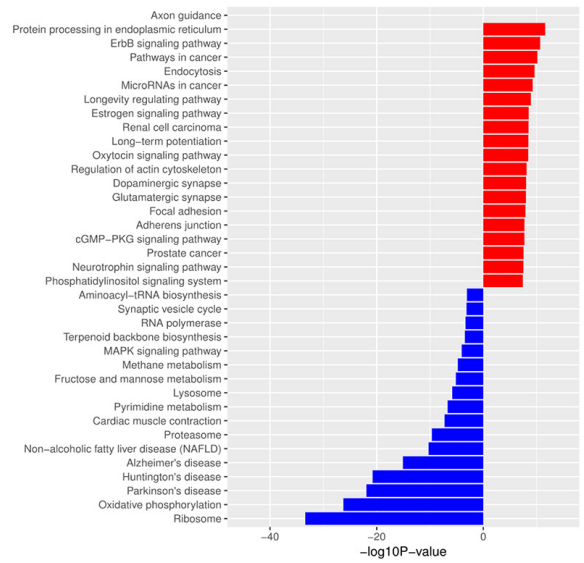**C****mPFC: rAAV2-retro**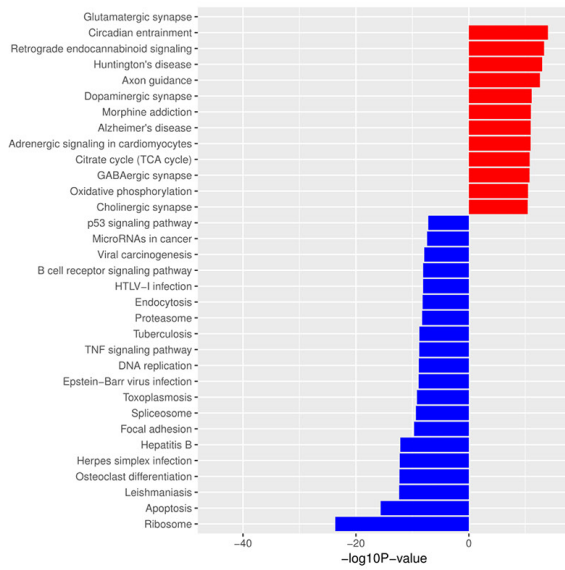**D****NAc: RV-ΔG**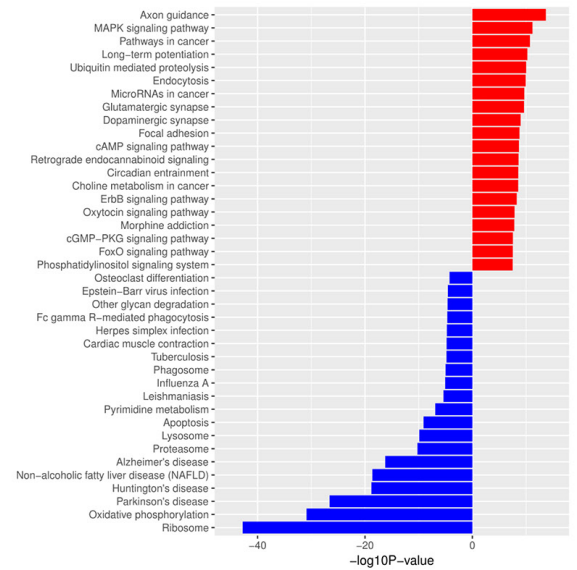

Supplement: 13024_2019_308_MOESM5_ESM.pdf [file 13024_2019_308_MOESM5_ESM.pdf]
